# Supplementary material
Source: PubMed Central journal article supplement (PMC3773768)
Supplement: 1307855110_pnas.201307855SI.pdf [file 1307855110_pnas.201307855SI.pdf]

# Supporting Information

Chehoud et al. 10.1073/pnas.1307855110

## SI Materials and Methods

Sequences were quality-trimmed and assigned to their respective sample based on their barcodes. Sequences were removed if they contained ambiguous bases, more than eight homopolymers, primer and/or barcode mismatches, or were <200 or >800 nt long. Sequences were binned into de novo OTUs using CDHIT (1) with a 97% minimum sequence identity threshold. The most abundant sequence from each OTU was selected as the representative sequence for that OTU. Taxonomy was assigned to the representative sequences by using Ribosomal Database Project (2) with a minimum support threshold of 80%. Sequences assigned as Streptophyta taxa, found in mouse chow, were removed from the dataset. Relative abundances of taxa were compared by using a paired Student *t* test. *P* values were adjusted for multiple comparisons by using a FDR adjustment in the R statistics package. The sequences were aligned with PyNAST (3) to the Greengenes reference database (4). Because  $\alpha$ - and  $\beta$ -diversity metrics are sensitive to sampling effort, the number of sequences per sample was standardized by subsampling. After filtering out hypervariable regions from the alignment using lanemask, the remaining sequences were then

used to build a phylogenetic tree by using the FastTree algorithm (5). Microbial community distances were calculated between all pairs of samples using the weighted and unweighted UniFrac metric (6), Bray–Curtis distance, and the binary Jaccard distance. PCoA was performed on the resultant distance matrices to visualize relationships between samples. The nonparametric Adonis test, implemented in QIIME, was used to assess the statistical significance of groupings of distance matrices. *P* values were calculated by using 999 permutations.

The eight RNA-seq libraries were sequenced on five lanes of the HiSeq, and we obtained a total of 1,230,593,054 paired end reads. The Tuxedo software tool suite (includes TopHat, Bowtie, Cufflinks, CummeRbund) (7) was used to align, assemble, and calculate gene expression values from the RNA-seq data using default parameters. Transcripts were mapped to mouse reference genome NCBI 37/mm9. Gene expression values were calculated as fragments per kilobase of transcript per million mapped fragments (FPKM) (8). Those transcripts that did not meet the expression threshold of FPKM >1 in at least two of the eight skin samples were filtered out of the dataset.

1. Li W, Godzik A (2006) Cd-hit: a fast program for clustering and comparing large sets of protein or nucleotide sequences. *Bioinformatics* 22(13):1658–1659.
2. Cole JR, et al. (2009) The Ribosomal Database Project: improved alignments and new tools for rRNA analysis. *Nucleic Acids Res* 37:D141–D145.
3. Caporaso JG, et al. (2010) PyNAST: a flexible tool for aligning sequences to a template alignment. *Bioinformatics* 26(2):266–267.
4. DeSantis TZ, et al. (2006) Greengenes, a chimera-checked 16S rRNA gene database and workbench compatible with ARB. *Appl Environ Microbiol* 72(7):5069–5072.
5. Price MN, Dehal PS, Arkin AP (2010) FastTree 2—approximately maximum-likelihood trees for large alignments. *PLoS One* 5(3):e9490.
6. Lozupone C, Knight R (2005) UniFrac: a new phylogenetic method for comparing microbial communities. *Appl Environ Microbiol* 71(12):8228–8235.
7. Trapnell C, et al. (2012) Differential gene and transcript expression analysis of RNA-seq experiments with TopHat and Cufflinks. *Nat Protoc* 7(3):562–578.
8. Mortazavi A, Williams BA, McCue K, Schaeffer L, Wold B (2008) Mapping and quantifying mammalian transcriptomes by RNA-Seq. *Nat Methods* 5(7):621–628.

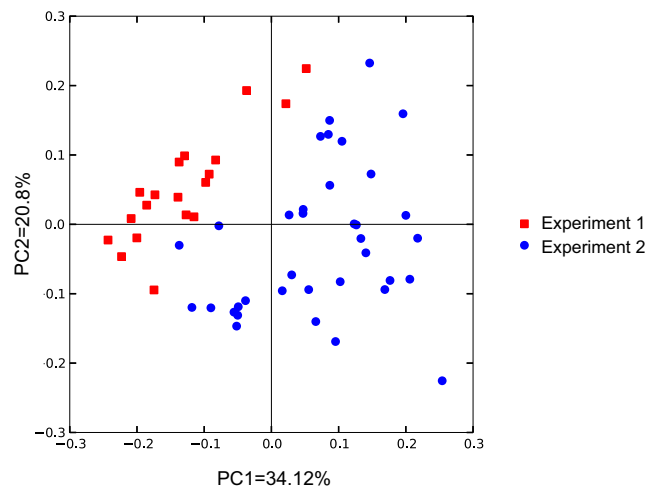

**Fig. S1.** Principal coordinate analysis of the weighted UniFrac illustrating the experiment-specific differences in overall skin microbiomes. Each circle or square represents an individual irrespective of time point of treatment. Red squares represent the first independent experiment; blue circles represent the second independent experiment. Percent variation explained by each principal component axis is indicated in parentheses.

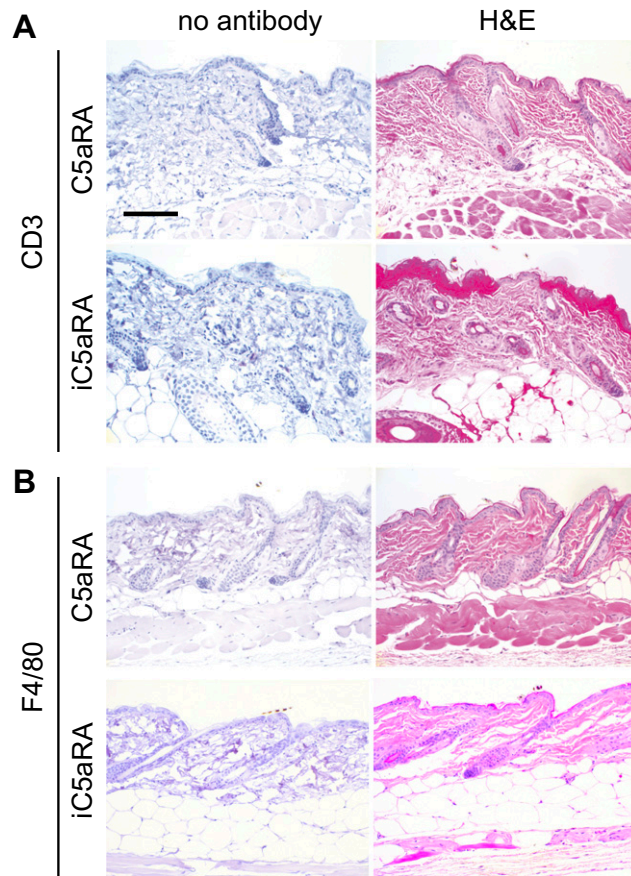

**Fig. S2.** Control staining for immunohistochemistry (Fig. 4) against CD3 (A) and F4/80 (B). (Left) Control sections with no primary antibody added before staining. (Right) H&E staining. (Scale bar: 100  $\mu$ m.)

**Table S1.**  $R^2$  and  $P$  values of Adonis test performed on each independent experiment comparing skin microbiota from complement C5aR-positive mice vs. C5aR-negative mice

| Parameter            | Experiment 1 | Experiment 2 |
|----------------------|--------------|--------------|
| Weighted UniFrac     |              |              |
| $R^2$                | 0.184        | 0.063        |
| $P$ value            | 0.006        | 0.039        |
| Unweighted UniFrac   |              |              |
| $R^2$                | 0.082        | 0.045        |
| $P$ value            | 0.012        | 0.010        |
| Bray-Curtis distance |              |              |
| $R^2$                | 0.117        | 0.060        |
| $P$ value            | 0.005        | 0.006        |
| Jaccard distance     |              |              |
| $R^2$                | 0.082        | 0.042        |
| $P$ value            | 0.004        | 0.001        |

**Table S2. Quantitative Real Time-PCR TaqMan primer and probe sets**

| Assay ID      | Gene symbol |
|---------------|-------------|
| Mm00833184_s1 | Ang         |
| Mm00475988_m1 | Arg1        |
| Mm02620006_s1 | C3ar1       |
| Mm00500292_s1 | C5ar1       |
| Mm00438285_m1 | Camp        |
| Mm01143935_g1 | Cfd         |
| Mm00438186_m1 | Cfh         |
| Mm00432803_m1 | Defb1       |
| Mm04214158_s1 | Defb3       |
| Mm00651498_m1 | Defb6       |
| Mm01168928_g1 | Elane       |
| Mm00514794_m1 | Ereg        |
| Mm01267981_s1 | Gpr77       |
| Mm00434513_m1 | Itgb2       |
| Mm01203811_m1 | Klk5        |
| Mm00434787_m1 | Ltf         |
| Mm00727183_s1 | Lyz2        |
| Mm00440338_m1 | Myd88       |
| Mm00805062_m1 | Nod1        |
| Mm00467543_m1 | Nod2        |
| Mm00726747_s1 | Rnase1      |
| Mm00491347_m1 | Rnase4      |
| Mm01218201_m1 | S100a7a     |
| Mm00496696_g1 | S100a8      |
| Mm00656925_m1 | S100a9      |
| Mm00656927_g1 | Saa1        |
| Mm00441530_g1 | Slpi        |
| Mm00446095_m1 | Tlr1        |
| Mm01233819_m1 | Tlr13       |
| Mm00442346_m1 | Tlr2        |
| Mm01207404_m1 | Tlr3        |
| Mm00445273_m1 | Tlr4        |
| Mm00546288_s1 | Tlr5        |
| Mm02529782_s1 | Tlr6        |
| Mm00446590_m1 | Tlr7        |
| Mm04209873_m1 | Tlr8        |
| Mm00446193_m1 | Tlr9        |
| Mm00454744_g1 | Wfdc12      |

This table displays TaqMan primer and probe sets (Life Technologies) used in Fig. 4A.
